# Supplementary figures and images for: Microbial degradation of organophosphorous compounds by Soil bacterial isolates
Source: Research Square preprint supplement (doi:10.21203/rs.3.rs-2072115/v2), 2022-11-07

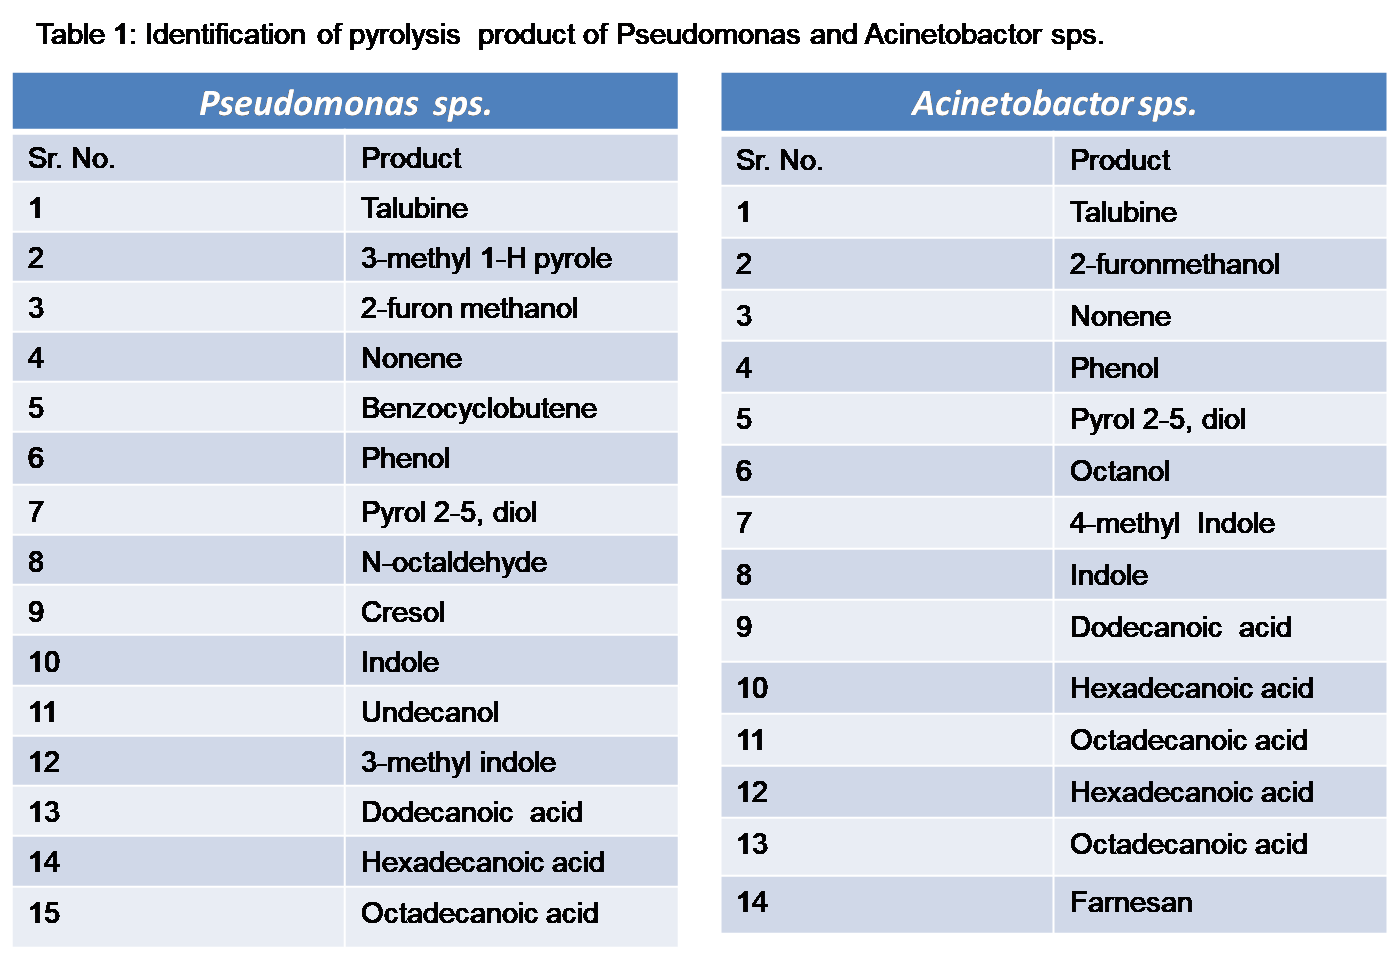

Supplement: Supplementary file 1 [file eb732722dfe06950bde60856.docx]
